# Supplementary material
Source: PubMed Central journal article supplement (PMC5215090)

**Supplementary Figure 3** DiSano B cells during viral encephalomyelitis

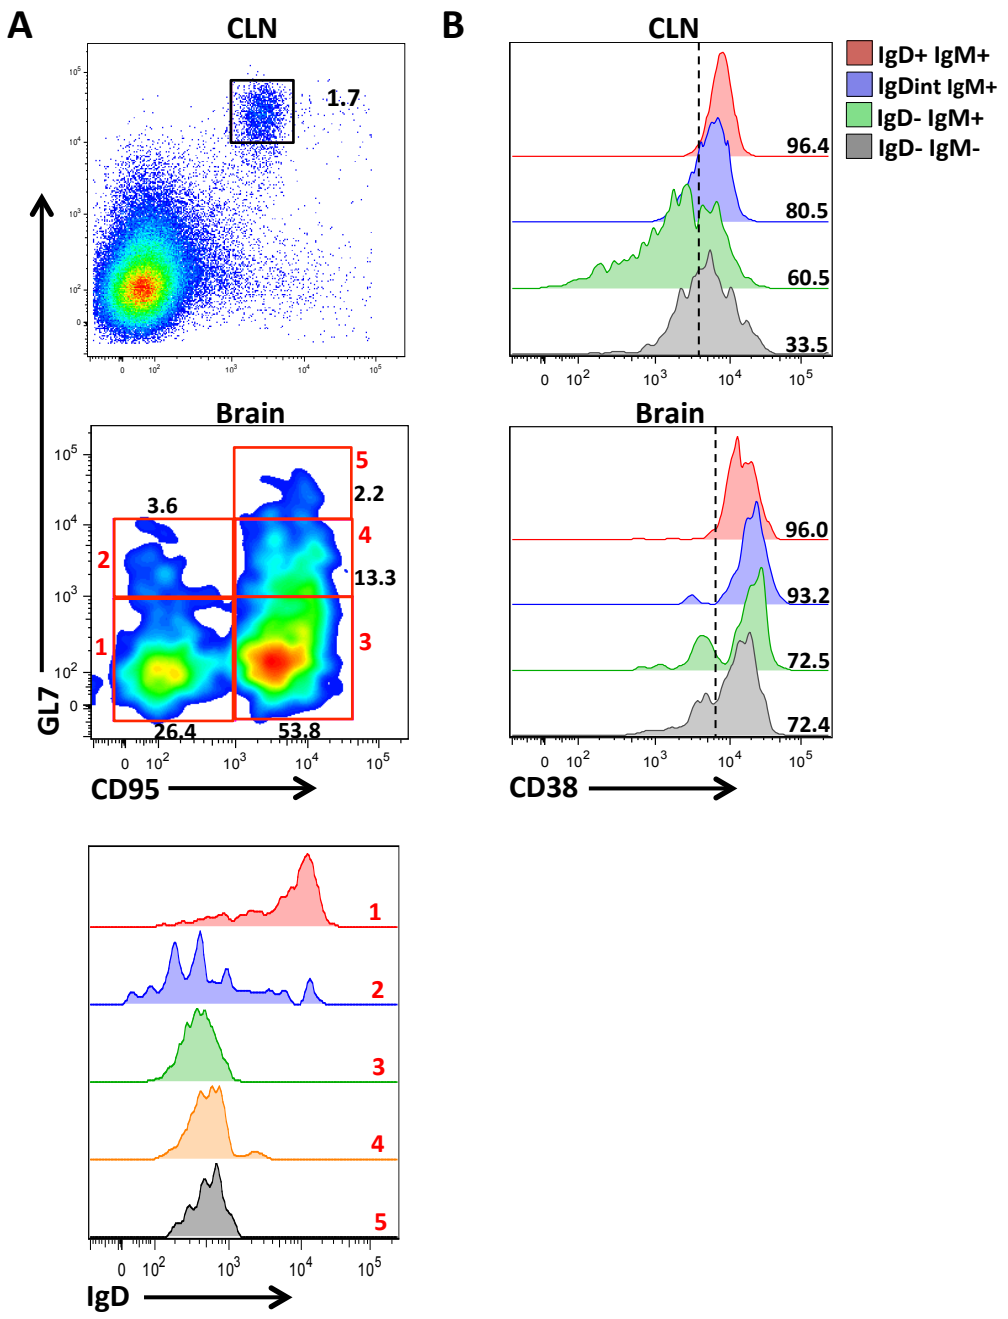

Supplement: NIHMS819039-supplement-4.pdf [file NIHMS819039-supplement-4.pdf]
